# Supplementary material for: Functional specialization of hippocampal somatostatin-expressing interneurons
Source: PubMed Central journal article supplement — bioRxiv. 2023 Apr 27:2023.04.27.538511. Preprint. [Version 1] doi: 10.1101/2023.04.27.538511 (PMC10168348; doi:10.1101/2023.04.27.538511), 2023-04-27
Supplement: NIHPP2023.04.27.538511V1-supplement-1.pdf [file NIHPP2023.04.27.538511V1-supplement-1.pdf]

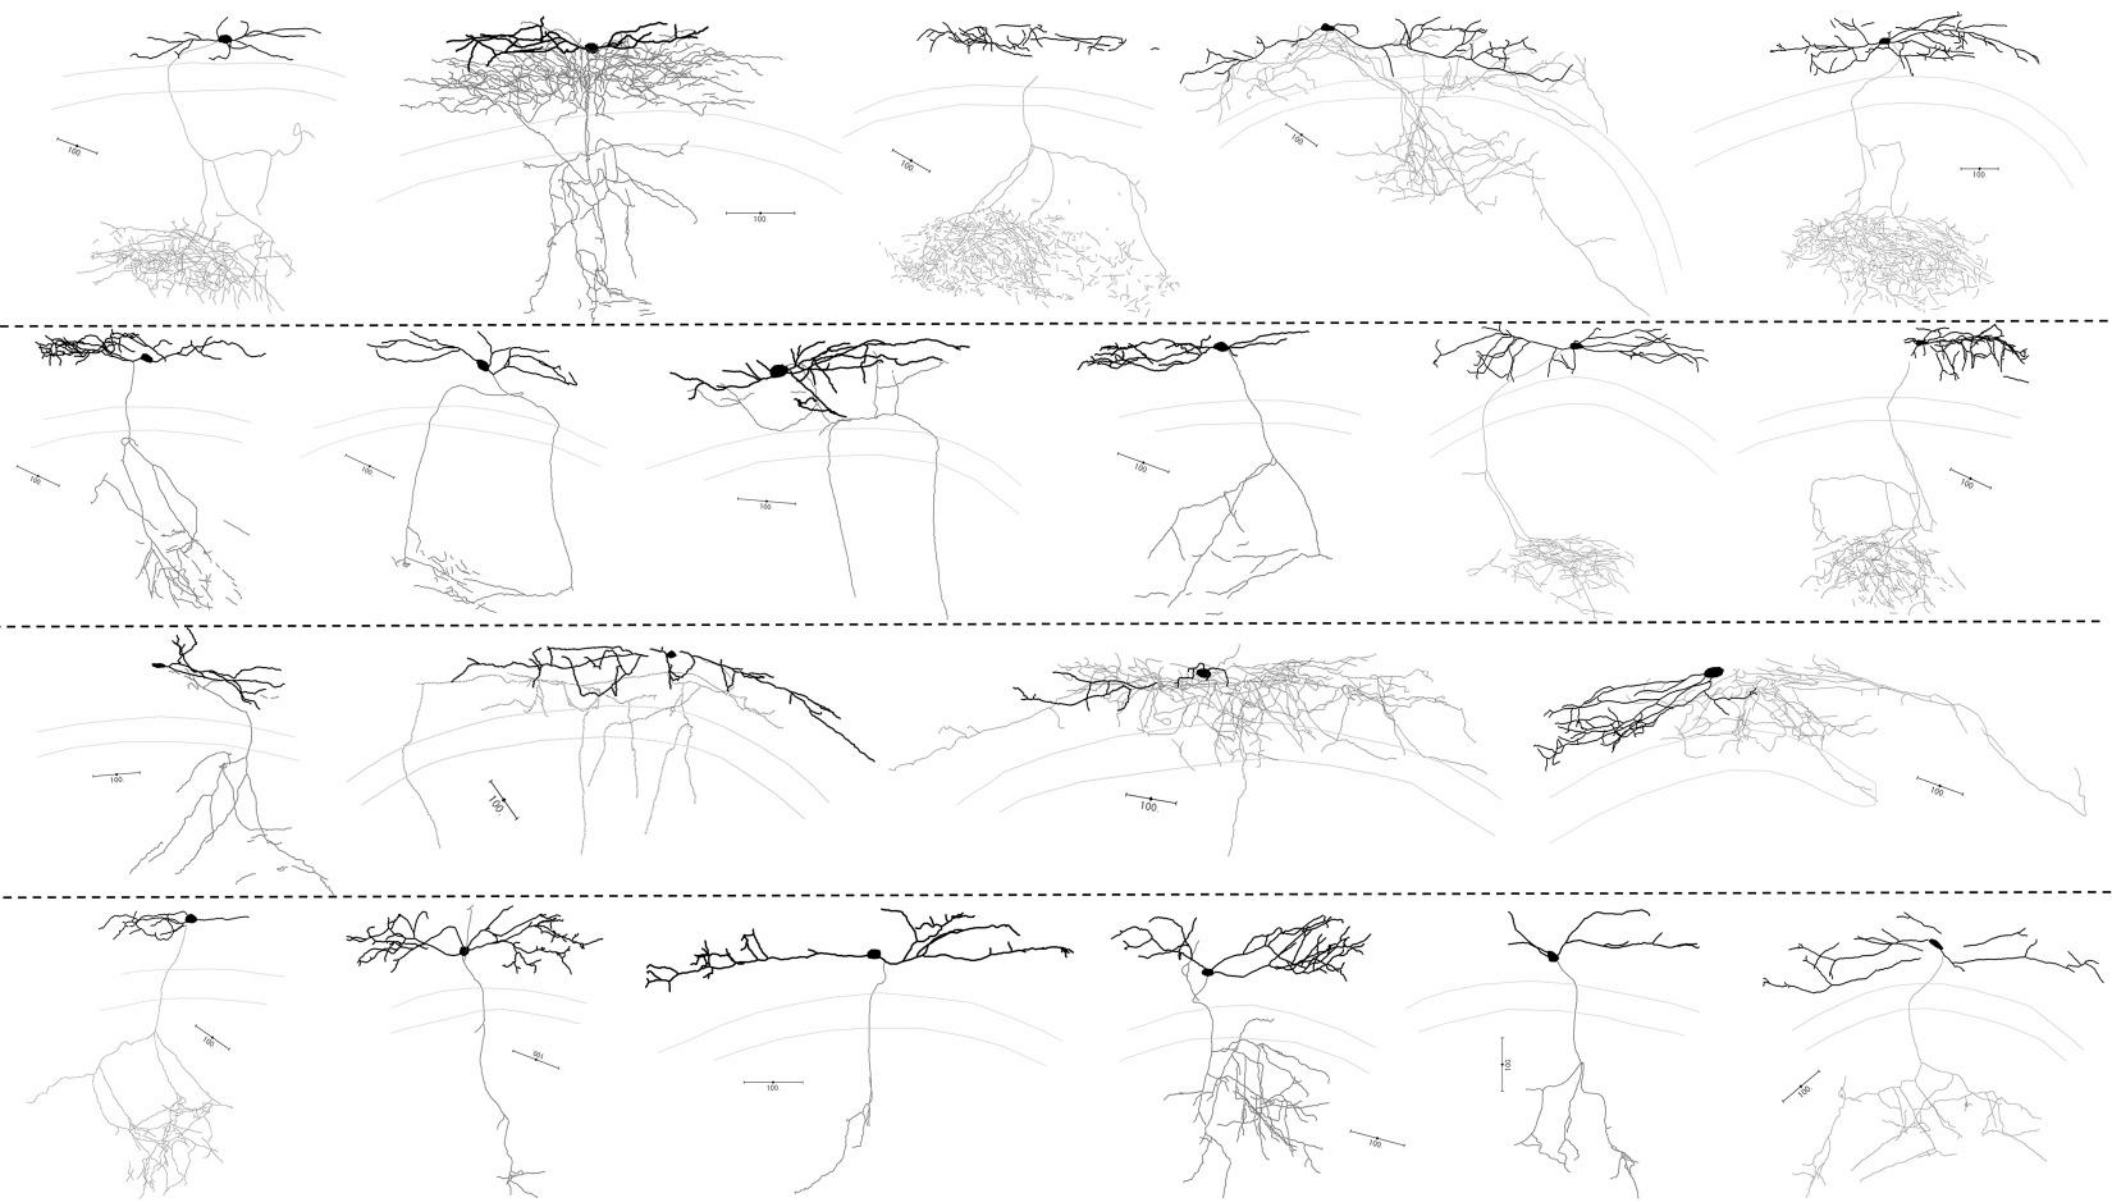

**Supplementary Figure 1**

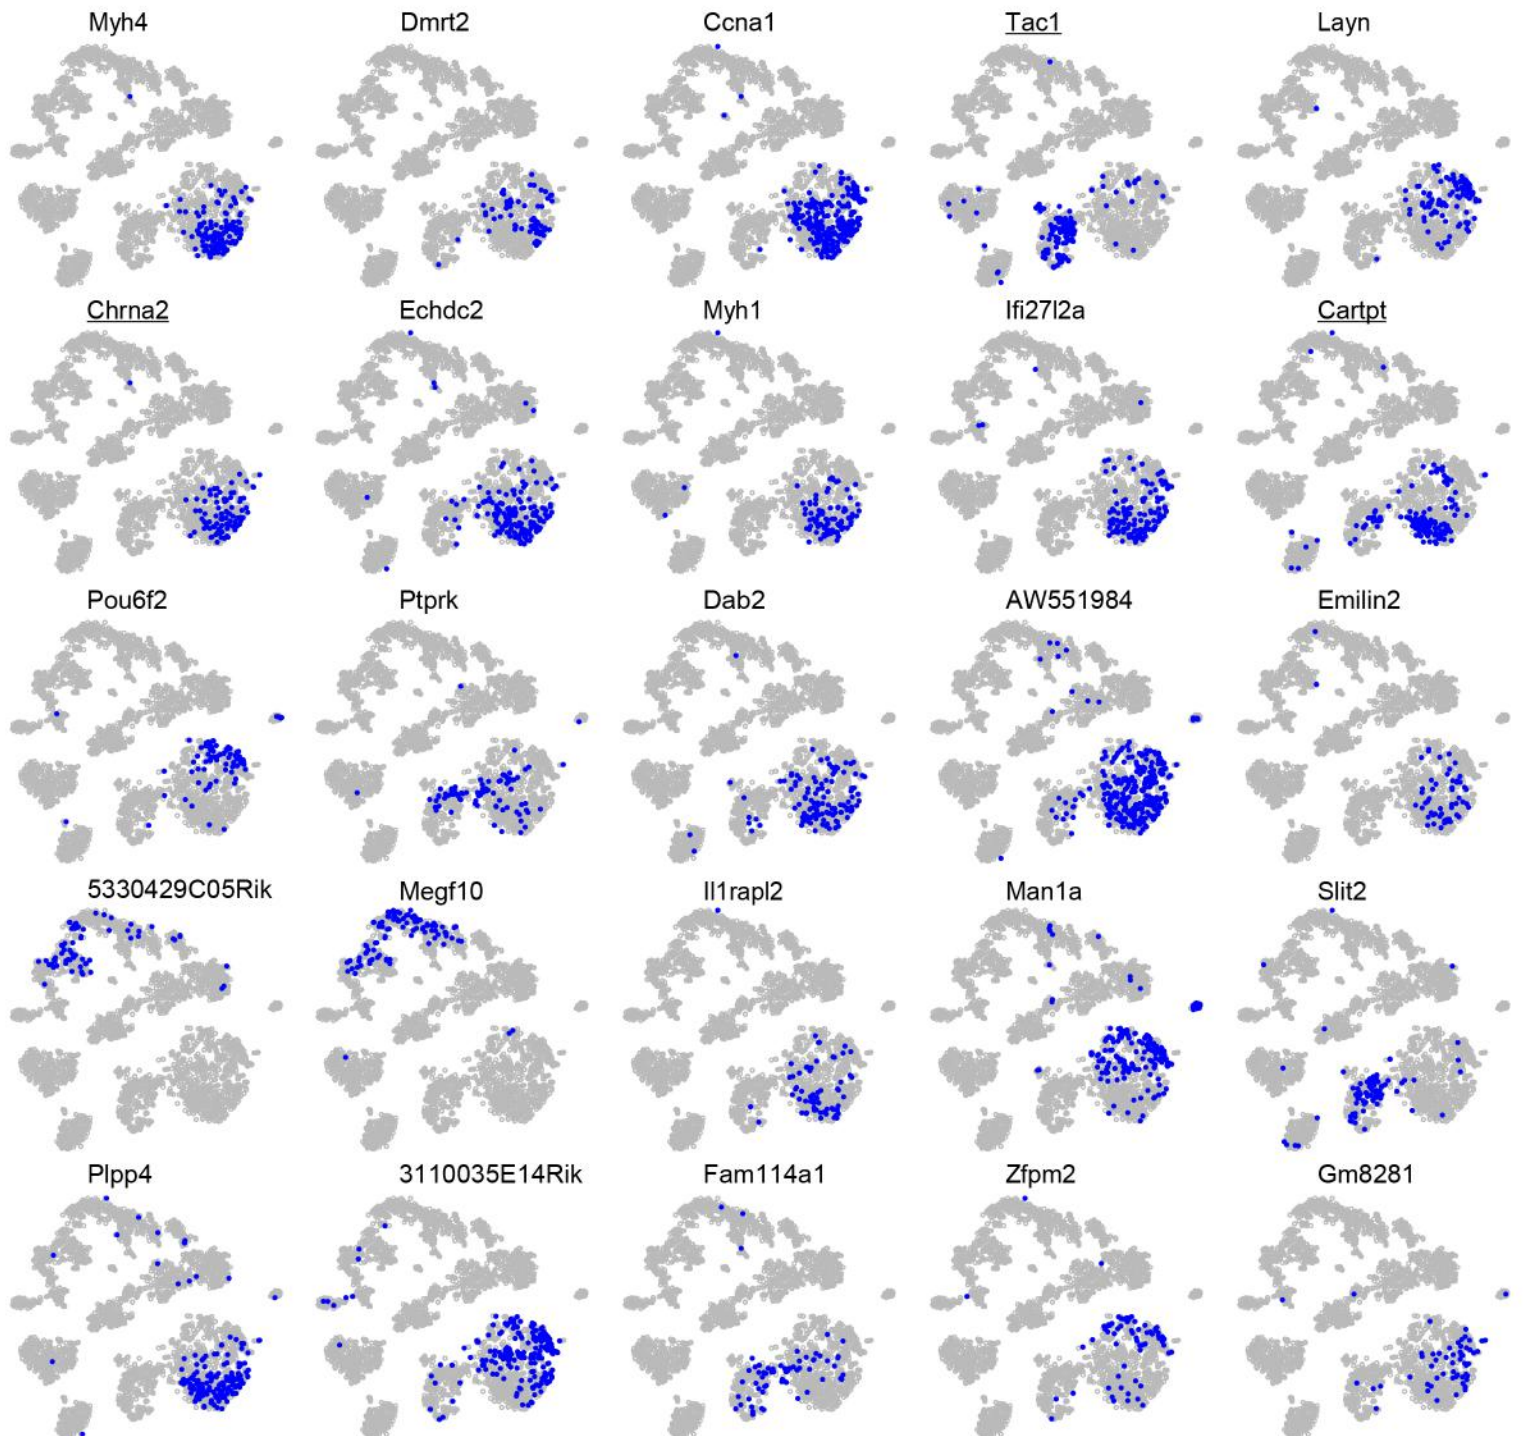

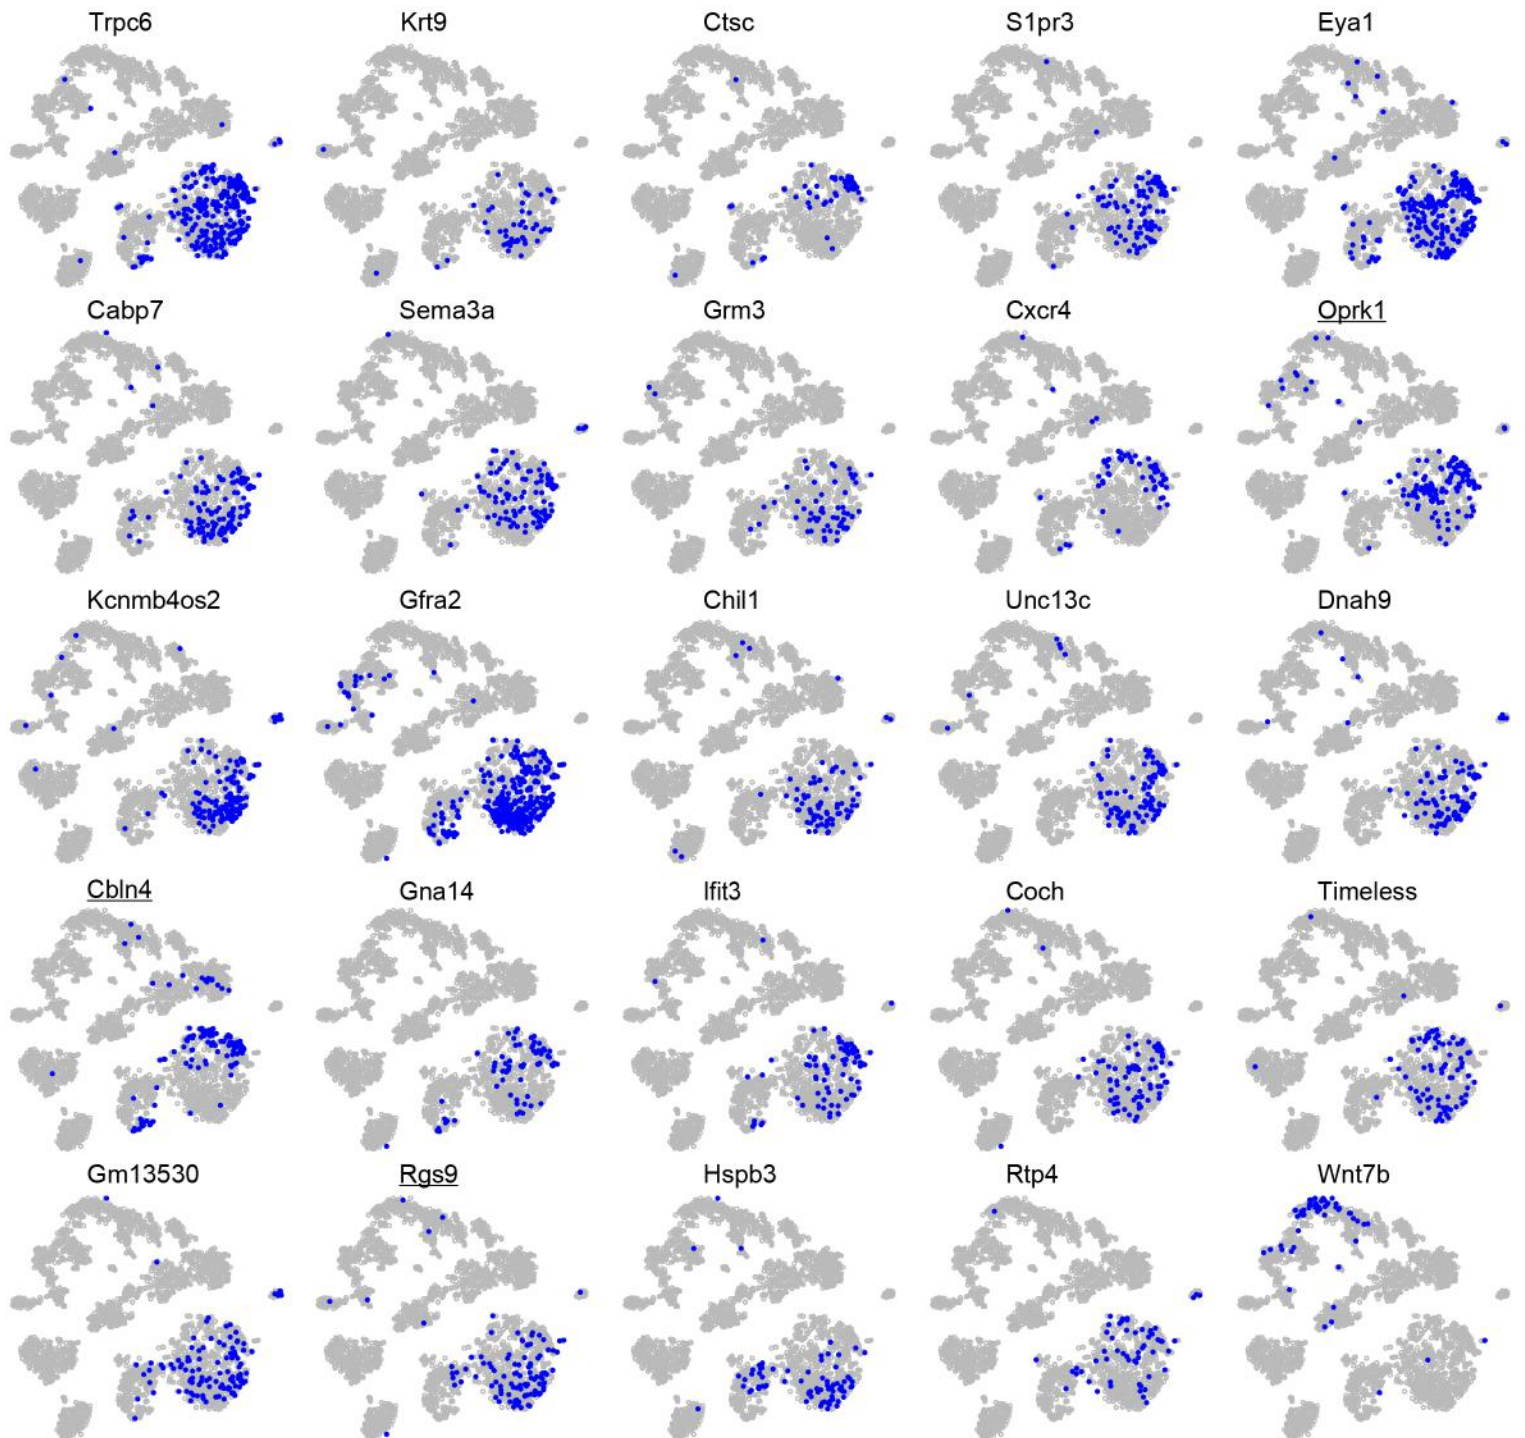

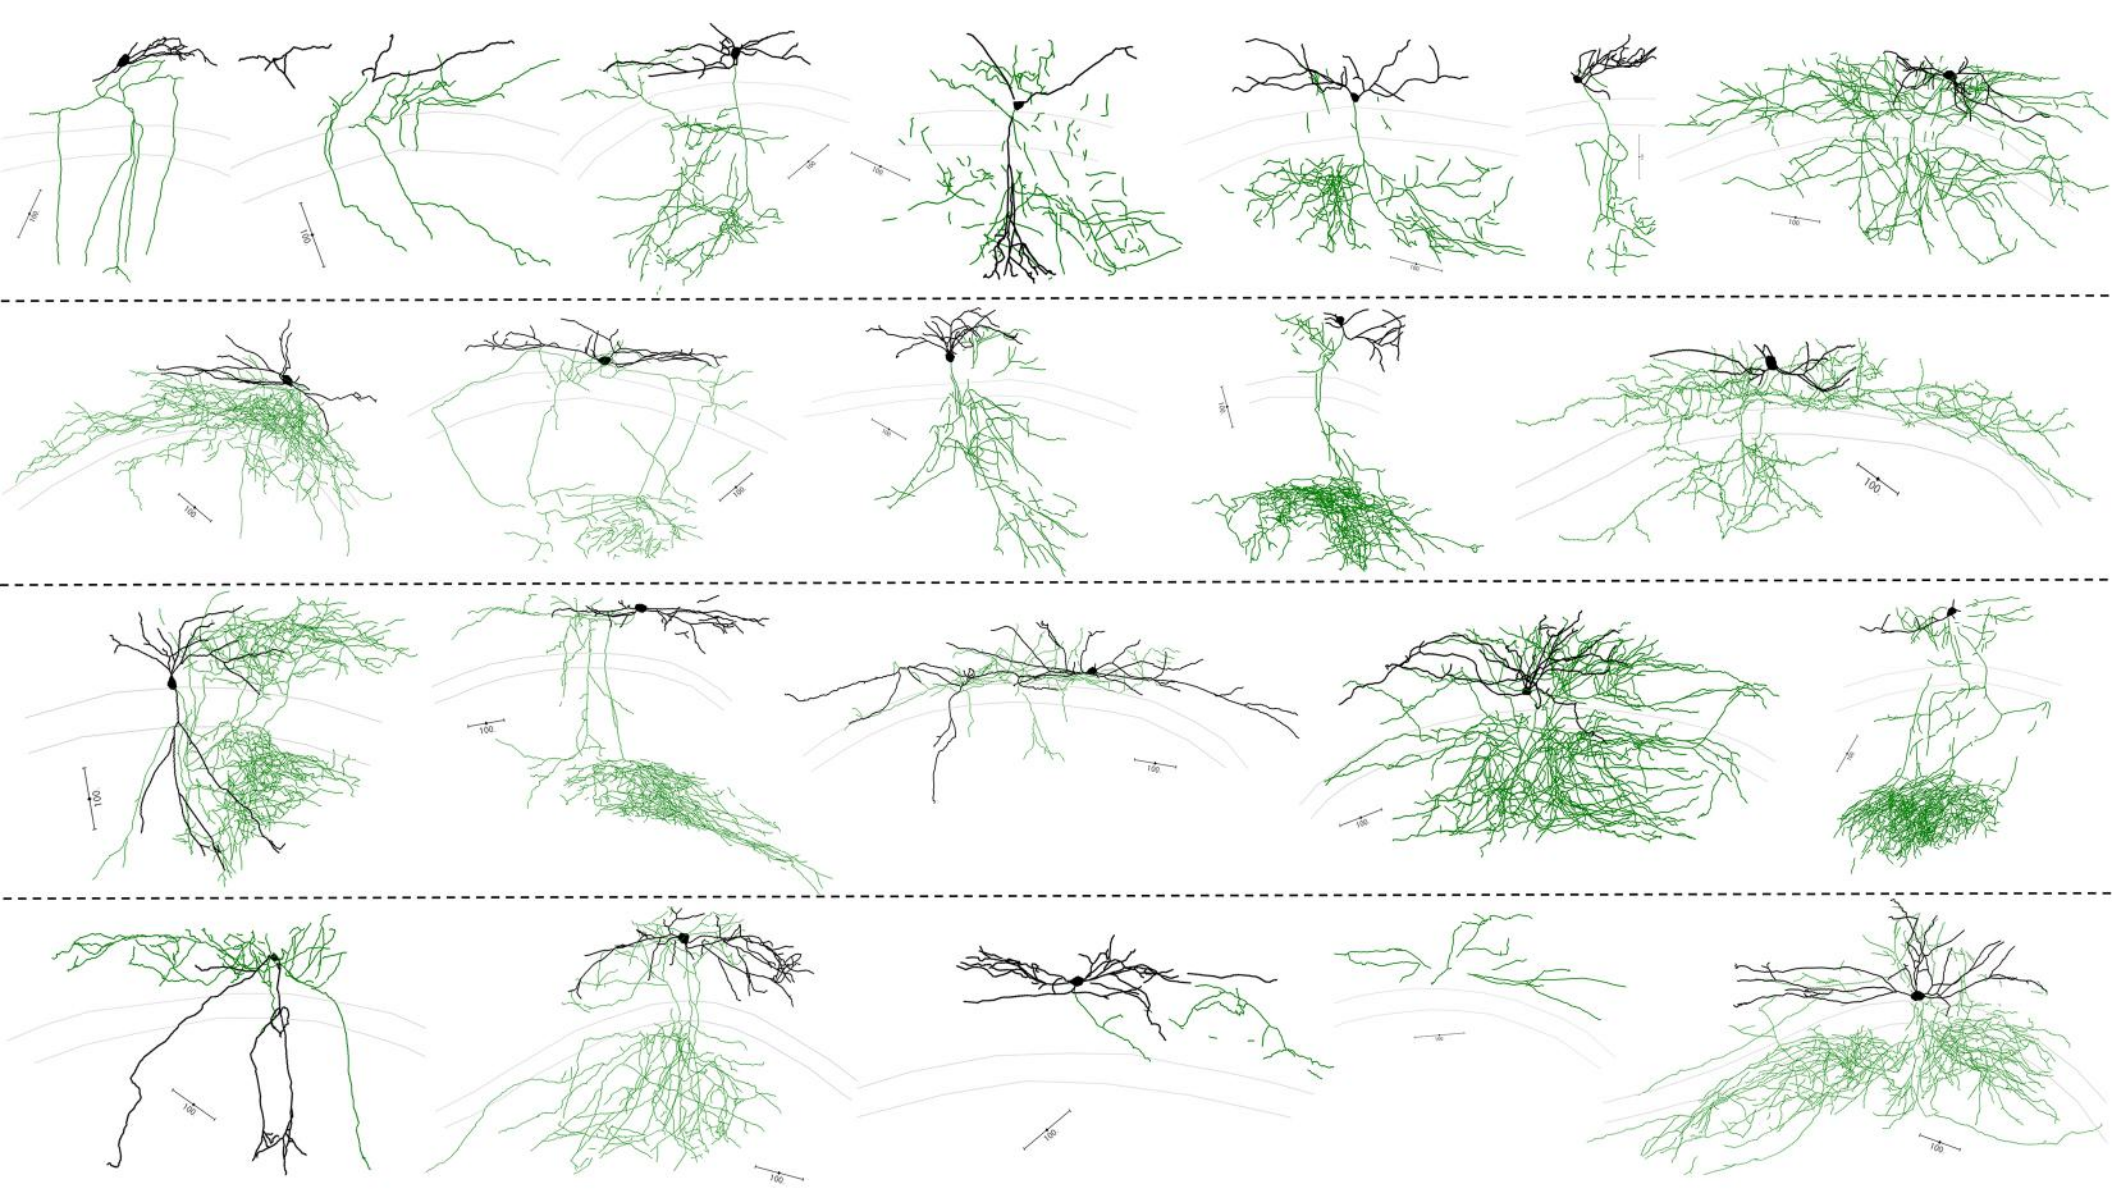

**Supplementary Figure 4**

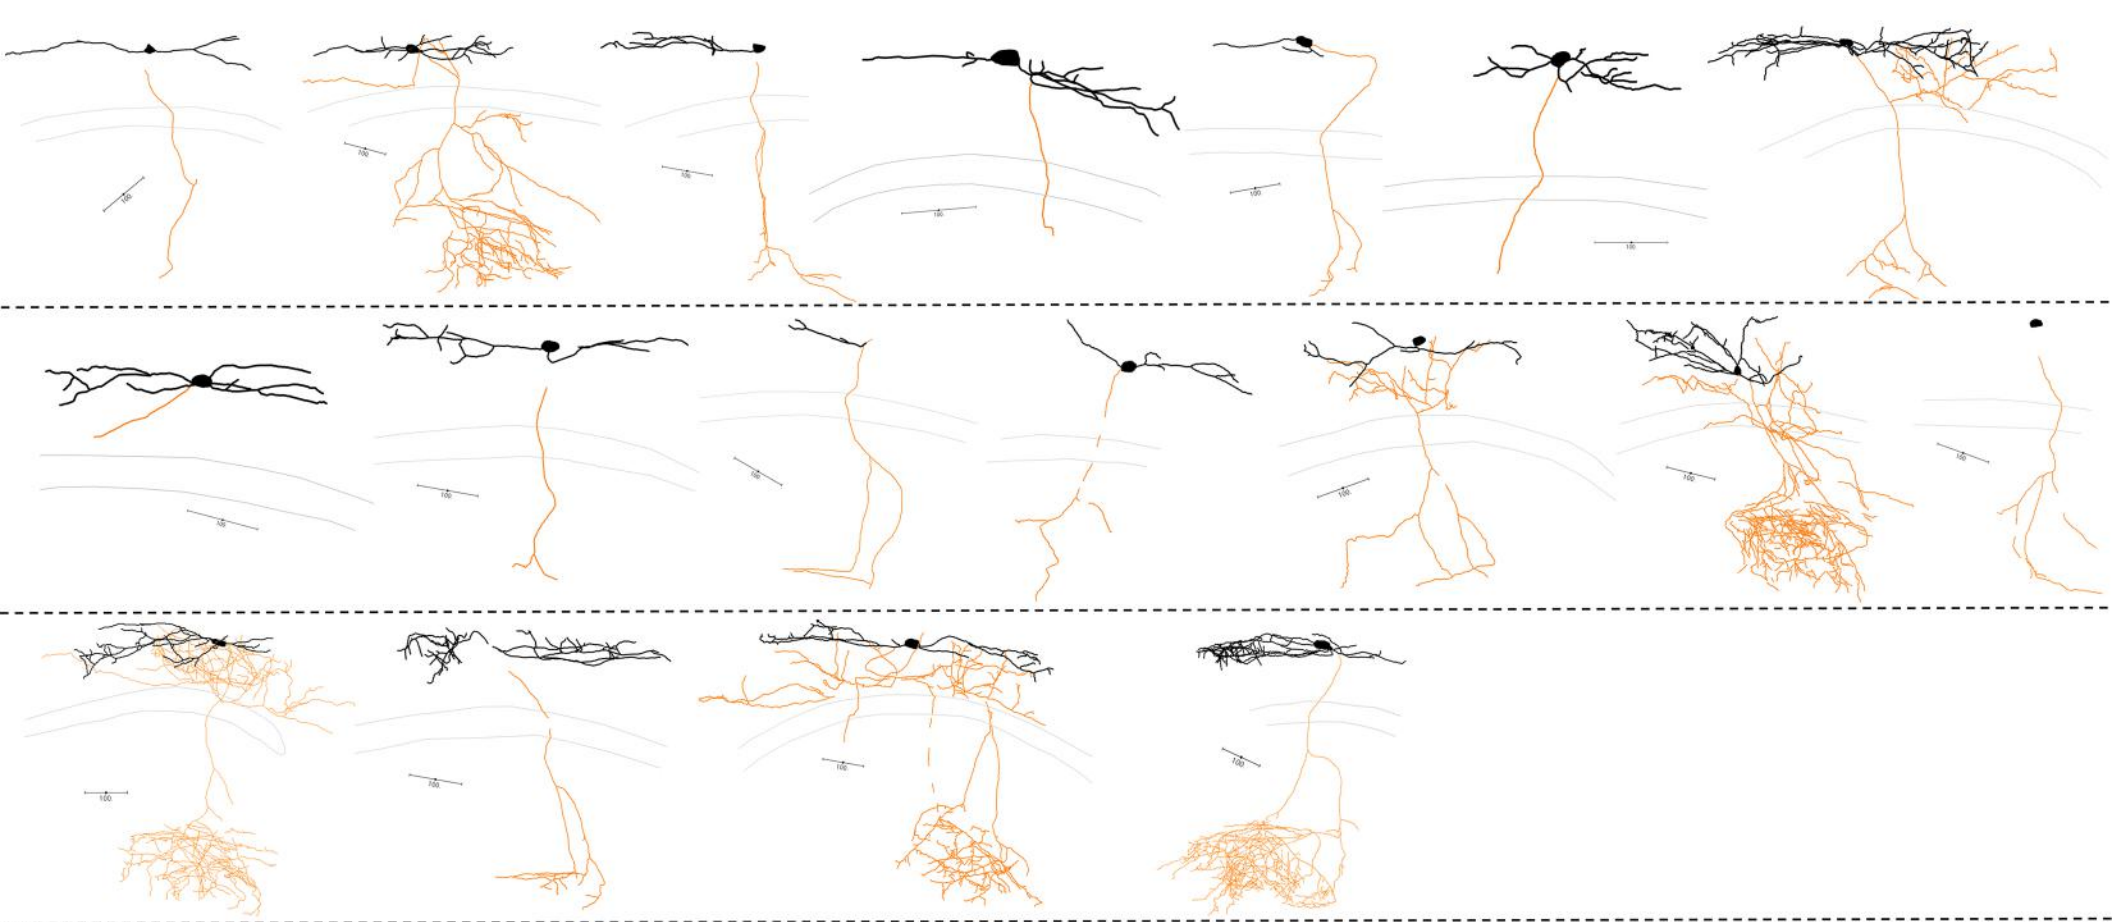

**Supplementary Figure 5**

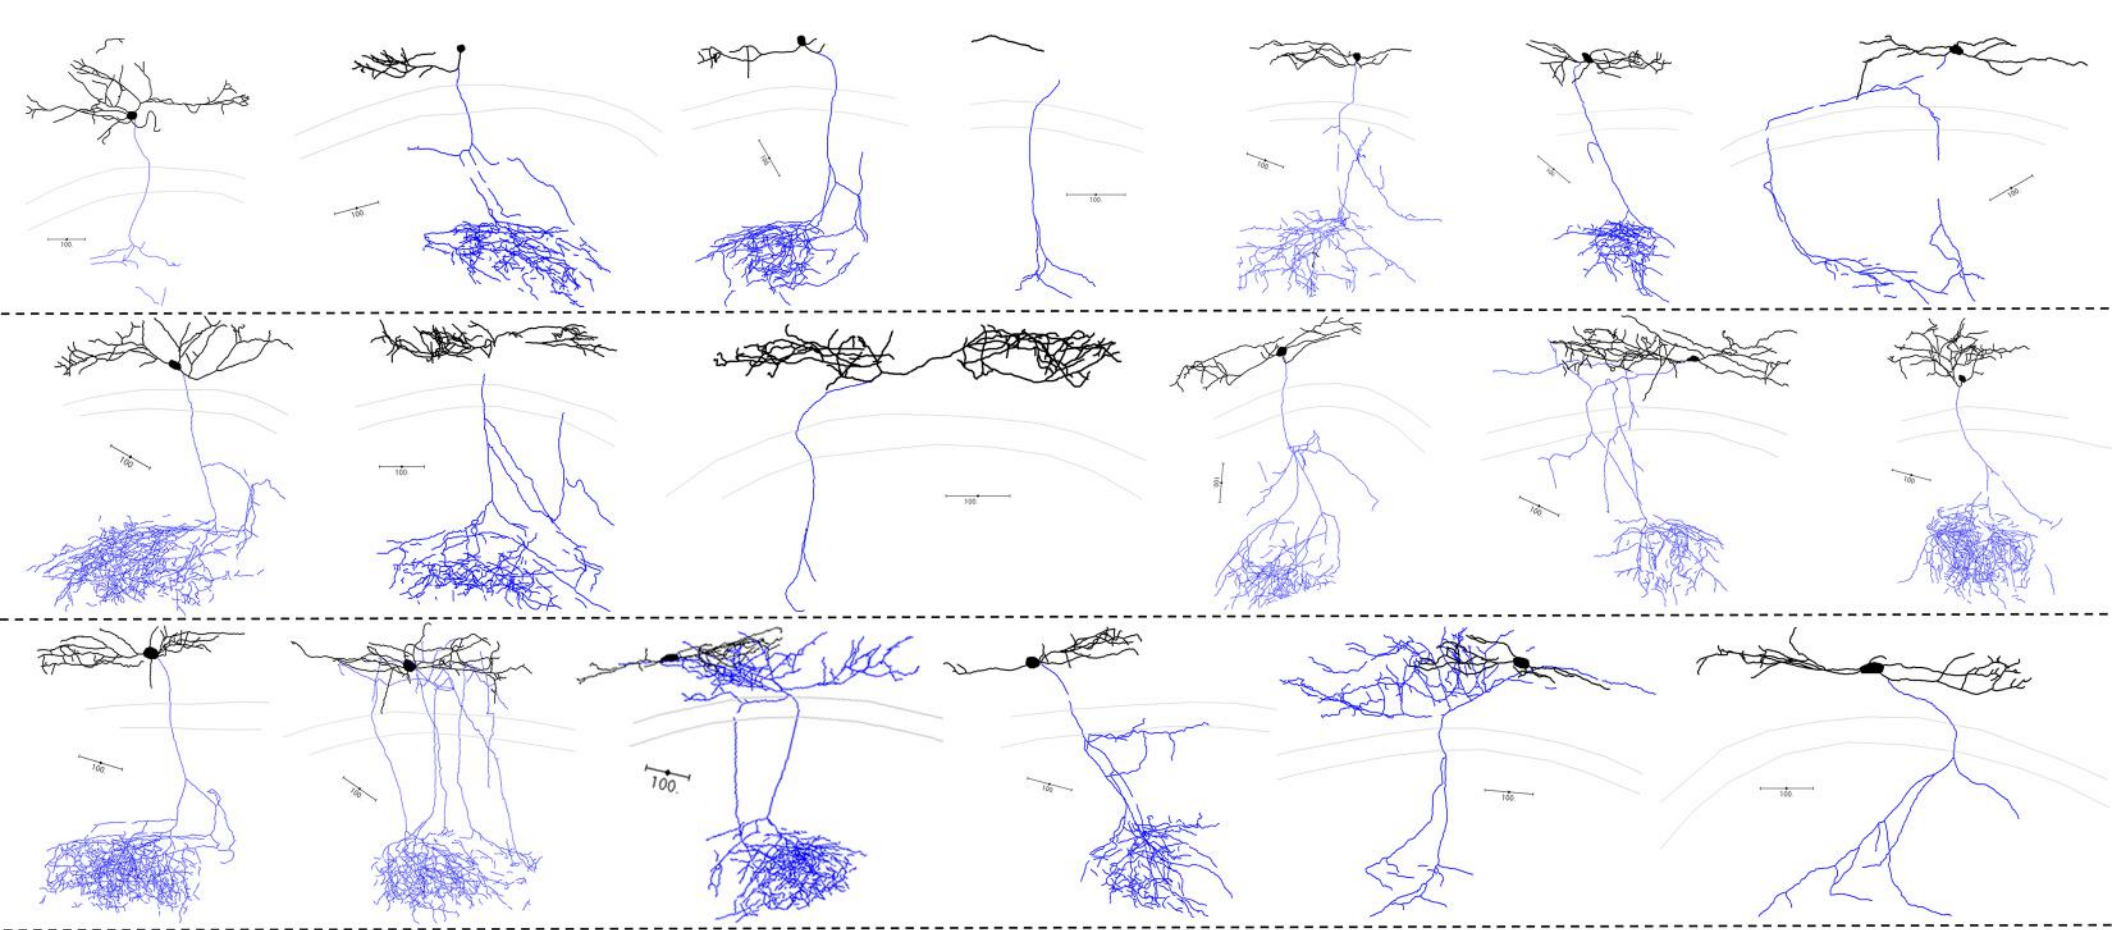

**Supplementary Figure 6**

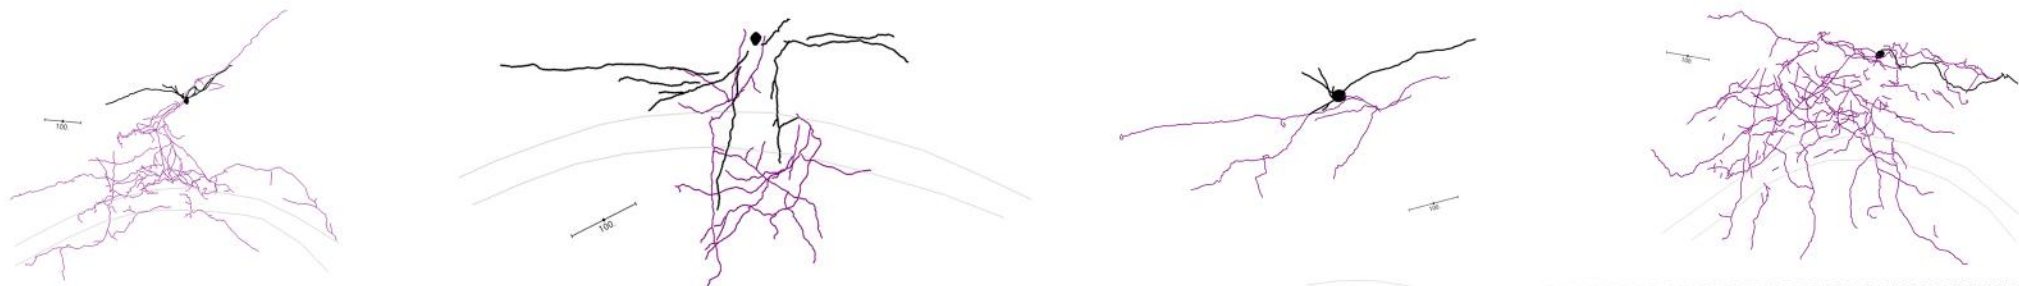

**Supplementary Figure 7**

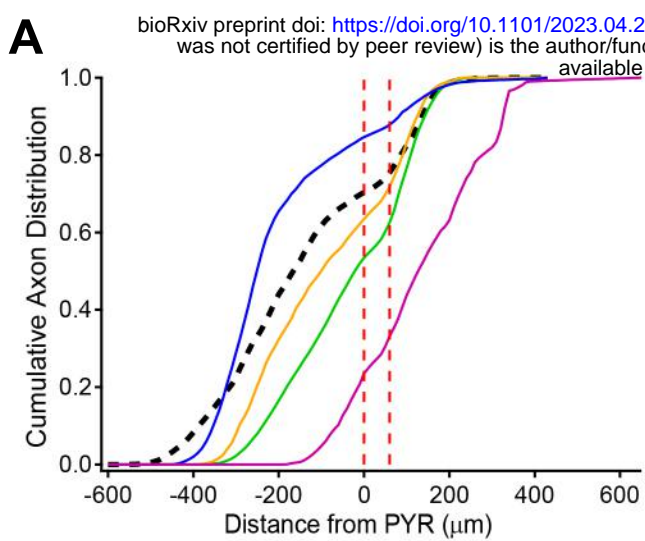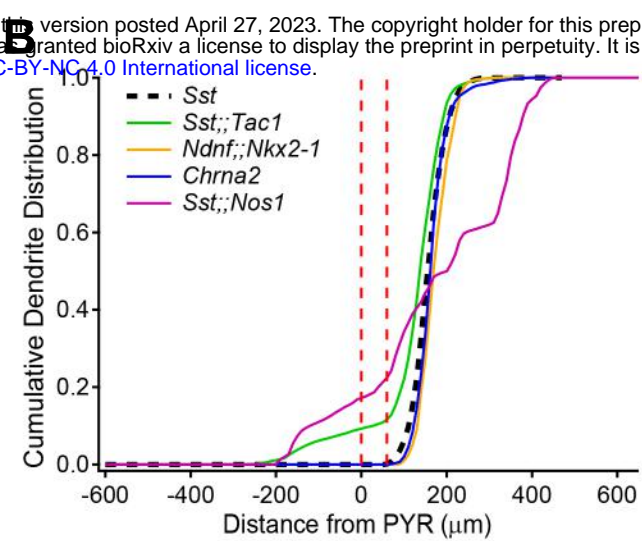



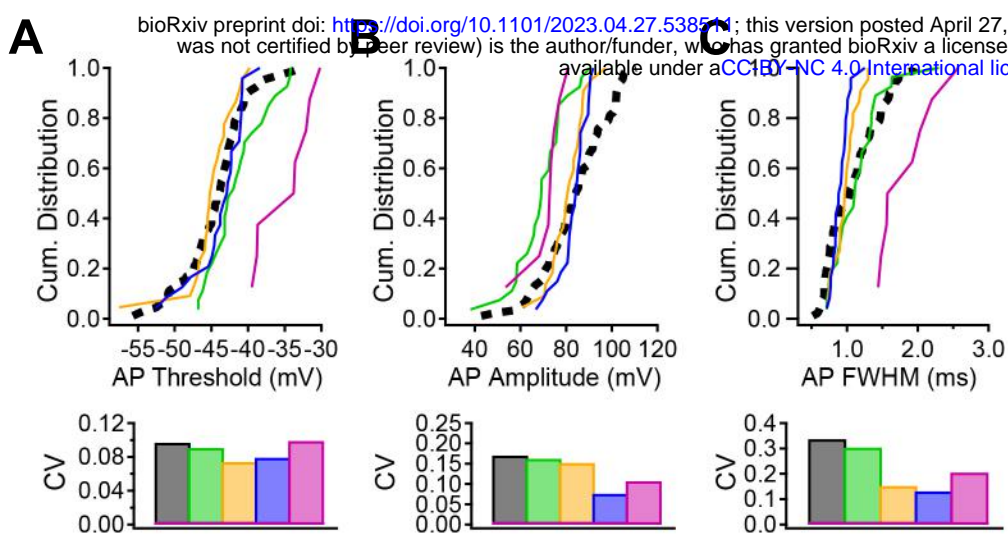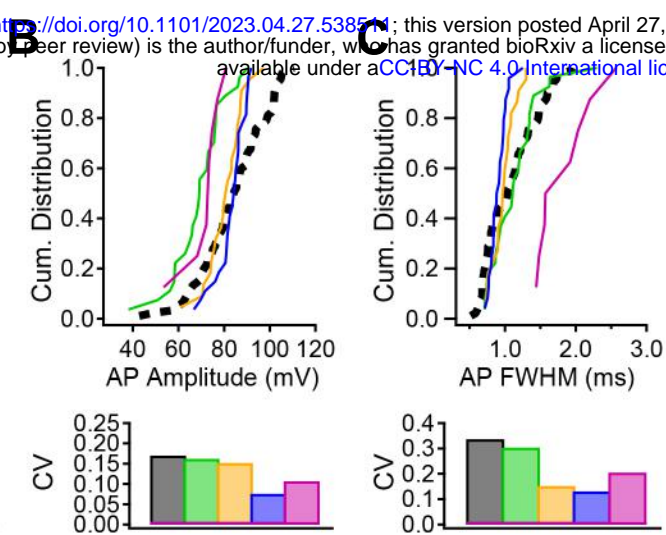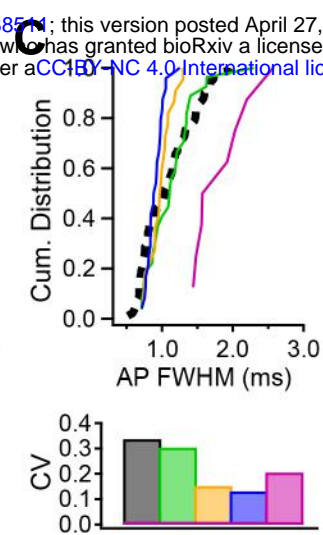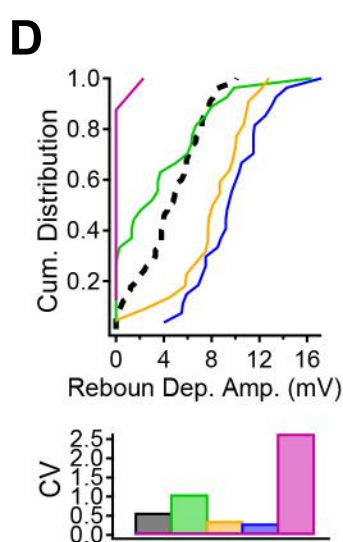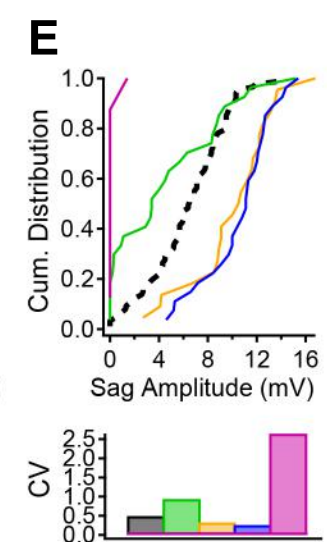

# Supplementary Table 1. p-values for statistical comparisons of anatomical parameters

| <b>p-values</b>  |                   | <b>Sst</b> | <b>Sst;;Tac1</b> | <b>Ndnf;;Nkx2-1</b> | <b>Chrna2</b> |
|------------------|-------------------|------------|------------------|---------------------|---------------|
| <b>axons</b>     | <b>Sst</b>        |            |                  |                     |               |
|                  | <b>Sst;;Tac1</b>  | 0.3417     |                  |                     |               |
|                  | <b>Ndnf;;Nkx2</b> | 0.3417     | 0.3417           |                     |               |
|                  | <b>Chrna2</b>     | 0.0036     | 0.005            | 0.0064              |               |
|                  | <b>Sst;;Nos1</b>  | 0.000048   | 0.000147         | 0.00001             | 0.00001       |
| <b>dendrites</b> | <b>Sst</b>        |            |                  |                     |               |
|                  | <b>Sst;;Tac1</b>  | 0.0032     |                  |                     |               |
|                  | <b>Ndnf;;Nkx2</b> | 1          | 0.00068          |                     |               |
|                  | <b>Chrna2</b>     | 1          | 0.0018           | 1                   |               |
|                  | <b>Sst;;Nos1</b>  | 0.0305     | 0.2416           | 0.0112              | 0.015         |

**Supplementary Table 2. p-values for statistical comparisons of electrophysiological parameters**

| <b>p-values</b>    |                   | <b>Sst</b> | <b>Sst;;Tac1</b> | <b>Ndnf;;Nkx2-1</b> | <b>Chrna2</b> |
|--------------------|-------------------|------------|------------------|---------------------|---------------|
| <b>ahp_max</b>     | <b>Sst</b>        |            |                  |                     |               |
|                    | <b>Sst;;Tac1</b>  | 1          |                  |                     |               |
|                    | <b>Ndnf;;Nkx2</b> | 0.2709     | 1                |                     |               |
|                    | <b>Chrna2</b>     | 0.4568     | 0.5976           | 0.051               |               |
|                    | <b>Sst;;Nos1</b>  | 1          | 1                | 0.567               | 1             |
| <b>ap_amp</b>      | <b>Sst</b>        |            |                  |                     |               |
|                    | <b>Sst;;Tac1</b>  | 0.00005    |                  |                     |               |
|                    | <b>Ndnf;;Nkx2</b> | 0.21       | 0.014            |                     |               |
|                    | <b>Chrna2</b>     | 0.18       | 0.00003          | 0.614               |               |
|                    | <b>Sst;;Nos1</b>  | 0.093      | 0.614            | 0.21                | 0.009         |
| <b>ap_thresh</b>   | <b>Sst</b>        |            |                  |                     |               |
|                    | <b>Sst;;Tac1</b>  | 0.2855     |                  |                     |               |
|                    | <b>Ndnf;;Nkx2</b> | 0.8342     | 0.0486           |                     |               |
|                    | <b>Chrna2</b>     | 0.8342     | 0.4924           | 0.4924              |               |
|                    | <b>Sst;;Nos1</b>  | 0.0001     | 0.0308           | 0.000144            | 0.000264      |
| <b>ap_fwhm</b>     | <b>Sst</b>        |            |                  |                     |               |
|                    | <b>Sst;;Tac1</b>  | 0.5658     |                  |                     |               |
|                    | <b>Ndnf;;Nkx2</b> | 0.3138     | 0.1336           |                     |               |
|                    | <b>Chrna2</b>     | 0.0075     | 0.0054           | 0.5658              |               |
|                    | <b>Sst;;Nos1</b>  | 0.0021     | 0.0008           | 0.000144            | 0.00012       |
| <b>sag</b>         | <b>Sst</b>        |            |                  |                     |               |
|                    | <b>Sst;;Tac1</b>  | 0.037      |                  |                     |               |
|                    | <b>Ndnf;;Nkx2</b> | 0.000252   | 0.0016           |                     |               |
|                    | <b>Chrna2</b>     | 0.00001    | 0.000252         | 0.9484              |               |
|                    | <b>Sst;;Nos1</b>  | 0.000088   | 0.0168           | 0.000112            | 0.000081      |
| <b>ap_maxdecay</b> | <b>Sst</b>        |            |                  |                     |               |
|                    | <b>Sst;;Tac1</b>  | 0.0072     |                  |                     |               |
|                    | <b>Ndnf;;Nkx2</b> | 0.0344     | 0.0135           |                     |               |
|                    | <b>Chrna2</b>     | 0.0028     | 0.000405         | 0.0344              |               |
|                    | <b>Sst;;Nos1</b>  | 0.0042     | 0.0055           | 0.000405            | 0.00009       |
| <b>ap_maxrise</b>  | <b>Sst</b>        |            |                  |                     |               |
|                    | <b>Sst;;Tac1</b>  | 0.003      |                  |                     |               |
|                    | <b>Ndnf;;Nkx2</b> | 0.4408     | 0.0016           |                     |               |
|                    | <b>Chrna2</b>     | 0.0884     | 0.00003          | 0.0884              |               |
|                    | <b>Sst;;Nos1</b>  | 0.006      | 0.349            | 0.0021              | 0.000189      |
| <b>rebound dep</b> | <b>Sst</b>        |            |                  |                     |               |
|                    | <b>Sst;;Tac1</b>  | 0.1044     |                  |                     |               |
|                    | <b>Ndnf;;Nkx2</b> | 0.000096   | 0.0052           |                     |               |
|                    | <b>Chrna2</b>     | 0.00001    | 0.000096         | 0.3972              |               |
|                    | <b>Sst;;Nos1</b>  | 0.00052    | 0.0558           | 0.000276            | 0.000081      |

## Supplementary Table 3: Contribution of individual parameters to the principal components

|             | PC1_feat | PC2_feat | PC3_feat | PC4_feat | PC5_feat | PC6_feat | PC7_feat | PC8_feat |
|-------------|----------|----------|----------|----------|----------|----------|----------|----------|
| ap_thresh   | 0.38     | 0.39     | 0.35     | 0.44     | 0.38     | 0.35     | 0.35     | 0.05     |
| ap_amp      | 0.09     | 0.17     | 0.38     | 0.14     | 0.44     | 0.33     | 0.32     | 0.63     |
| ap_fwhm     | 0.54     | 0.13     | 0.02     | 0.03     | 0.09     | 0.48     | 0.48     | 0.47     |
| ap_maxrise  | 0.12     | 0.68     | 0.56     | 0.22     | 0.02     | 0.24     | 0.04     | 0.32     |
| ap_maxdecay | 0.66     | 0.01     | 0.11     | 0.53     | 0.08     | 0.01     | 0.24     | 0.45     |
| sag         | 0.17     | 0.08     | 0.26     | 0.08     | 0.06     | 0.68     | 0.64     | 0.14     |
| rebound dep | 0.18     | 0.57     | 0.55     | 0.42     | 0.28     | 0.14     | 0.27     | 0.02     |
| ahp_max     | 0.22     | 0.12     | 0.20     | 0.52     | 0.75     | 0.07     | 0.04     | 0.23     |
